# Supplementary material for: Development of a Digital RT-PCR Method for Absolute Quantification of Bluetongue Virus in Field Samples
Source: Front Vet Sci. 2020 Apr 21;7:170. doi: 10.3389/fvets.2020.00170 (PMC7186476; doi:10.3389/fvets.2020.00170)
Supplement: Supplementary file 1 [file Table_1.xlsx]

## Sheet: Foglio1
	Table S1| Comparison of RT-ddPCR and RTqPCRNS3 assays for quantitative detection of BTV in field samples. a= Field samples analyzed in RT-qPCRNS3 and RT-ddPCR; b= Mean of the individual Cq values obtained by RT-qPCRNS3 ± Standard Deviation; c= Coefficient of variation; d= Copies BTV/µl of sample; e Log of copies number BTV in µl/sample; f= Mean of copies number BTV in µl detected by RT-ddPCR ± St…
		Real Time RT-qPCRNS3				RT-ddPCR
	Field samplea	Mean Cq values ± SDb	CV(%)c	Copies BTV/µl sampled	Log (copies/µl)e	Mean values (copies/µl mix) ± SDf	Copies BTV/µl sampled	CV(%)c	Log (copies/µl)e	Log differenceg
	Culicoides 79633/1	27.81 ± 0.09	0.31	9701.38	4.0	87.00 ± 2.80	9787.5	3.30	4.0	0.0
	Culicoides 79633/3	28.21 ± 0.20	0.08	7277.90	3.9	48.00 ± 2.10	5400.00	4.40	3.7	0.2
	Culicoides 79633/5	23.72 ± 0.06	0.24	91433.73	5.0	53.70 ± 5.60	60356.25	10.40	4.8	0.2
	Culicoides 79633/8	24.05 ± 0.16	0.68	75950.56	4.9	34.50 ± 3.50	38812.00	10.00	4.6	0.3
	Culicoides 79633/9	22.00 ± 0.21	0.95	242211.14	5.4	25.85 ± 1.90	116325.00	7.40	5.1	0.3
	Culicoides 79633/10	31.35 ± 0.03	0.09	1226.22	3.1	8.60 ± 1.70	387.00	19.70	2.6	0.5
	Culicoides 79633/11	36.70 ± 0.70	1.90	70.02	1.8	5.50 ± 0.40	38.50	2.06	1.6	0.2
	Culicoides 71189/1	24.21 ± 2.07	8.56	68638.03	4.8	21.60 ± 2.40	97.20	11.10	4.6	0.2
	Culicoides 71189/6	24.91 ± 0.09	0.36	44221.17	4.6	10.70 ± 0.40	48.15	4.00	3.9	0.7
	Culicoides 71189/7	24.90 ± 0.08	0.34	44530.87	4.6	5.10 ± 0.40	22.95	8.30	3.6	1.0
	Culicoides 71820/6	21.87 ± 0.15	0.66	257642.51	5.4	21.35 ± 1.90	96.08	8.90	4.8	0.6
	Culicoides 71820/8	31.44 ± 0.03	0.09	1090.00	3.0	1.15 ± 0.10	5.18	6.10	1.9	1.1
	Culicoides 72678/1	29.34 ± 0.13	0.45	3625.14	3.6	18.09 ± 17.00	8140.05	0.90	3.9	-3.0
	Culicoides 72678/4	23.15 ± 0.07	0.29	119916.18	5.1	16.20 ± 1.60	72.9	9.60	4.5	0.6
	Culicoides 72678/5	29.31 ± 0.00	0.00	3642.75	3.6	944.50 ± 4.90	4250.00	0.50	3.6	0.0
	Culicoides 72678/7	22.83 ± 0.10	0.45	144674.11	5.2	10.85 ± 0.20	48.83	2.00	4.5	0.7
	Blood 79384/1	30.86 ± 0.02	0.06	1625.47	3.2	31.85 ± 1.30	1433.25	4.20	3.2	0.0
	Blood 79384/2	37.55 ± 0.07	0.20	36.93	1.6	5.85 ± 0.80	26.30	13.30	1.4	0.2
	Blood 79384/3	34.99 ± 0.15	0.44	160.06	2.2	5.50 ± 0.40	117.90	7.39	2.1	0.1
	Blood 79386/1	31.40 ± 0.05	0.15	1187.62	3.1	2.60 ± 0.32	695.25	12.21	2.8	0.0
	Blood 79386/2	32.78 ± 0.11	0.35	546.29	2.7	1976.00 ± 21.66	155.70	1.10	2.2	0.5
	Blood 79386/3	31.26 ± 0.12	0.38	1291.15	3.1	9.10 ± 0.10	409.50	1.60	2.6	0.5
	Blood 79390/1	34.89 ± 0.26	0.74	168.73	2.2	22.60 ± 0.80	101.70	3.80	2.0	0.2
	Blood 79390/2	30.01 ± 0.44	1.48	2712.23	3.4	4.25 ± 0.40	191.25	8.30	2.3	1.1
	Blood 79390/3	31.84 ± 0.11	0.36	935.12	3.0	13.80 ± 1.70	621.00	12.30	2.8	0.2
	Blood 79364/1	37.71 ± 0.29	0.78	36.02	1.6	4.00 ± 0.30	18.00	7.10	1.3	0.3
	Blood 79364/2	35.23 ± 0.05	0.13	136.48	2.1	6.70 ± 0.80	30.15	12.70	1.5	0.6
	Blood 79364/3	36.10 ± 0.82	2.27	100.49	2.0	12.85 ± 0.60	57.82	5.00	1.8	0.2
	Blood 127	26.82 ± 0.03	0.11	2571.00	3.4	654.30 ± 11.72	2944.35	1.79	3.5	-0.1
	Blood 236	35.52 ± 0.27	0.77	9.00	1.0	0.60 ± 0.10	2.70	18.12	0.4	0.5
	Blood 341	32.05 ± 0.04	0.14	88.00	1.9	16.30 ± 0.91	73.35	5.58	1.9	0.1
	Blood 449	27.60 ± 0.05	0.19	1550.00	3.2	179.30 ± 3.79	806.85	2.11	2.9	0.3
	Blood 695	29.74 ± 0.12	0.39	390.00	2.6	50.30 ± 3.21	226.35	6.38	2.4	0.2
	Blood 8123	36.31 ± 0.24	0.65	5.00	0.7	1.00 ± 0.24	4.50	24.19	0.7	0.0
	Blood 9124	27.56 ± 0.16	0.57	1599.00	3.2	252.00 ± 5.20	1134.00	2.06	3.1	0.1
	Blood 11173	31.70 ± 0.03	0.10	106.00	2.0	24.10 ± 0.82	108.45	3.40	2.0	0.0
	Blood 13247	29.13 ± 0.14	0.49	577.00	2.8	58.70 ± 1.71	264.15	2.91	2.4	0.3
	Blood 14262	32.60 ± 0.04	0.12	60.00	1.8	5.50 ± 0.40	24.75	7.39	1.4	0.4
	Blood 15278	35.36 ± 0.63	1.78	11.00	1.0	2.60 ± 0.32	11.70	12.21	1.1	0.0
	Blood 16279	23.31 ± 0.15	0.62	24750.00	4.4	1976.00 ± 21.66	8892.00	11.10	3.9	0.4
	Blood 17290	23.65 ± 0.07	0.29	20904.00	4.3	2739.30 ± 115.40	12326.85	4.21	4.1	0.2
	Blood 18296	32.56 ± 0.11	0.33	63.00	1.8	9.90 ± 0.55	44.55	5.58	1.6	0.2
	Blood 19301	32.50 ± 0.03	0.10	66.00	1.8	56.00 ± 2.14	252.00	3.82	2.4	-0.6
	Blood 20307	39.16 ± 0.70	1.79	1.00	0.0	0.10 ± 0.08	0.45	5.27	-0.3	0.3
